# Supplementary material for: Insect Cell-Expressed Major Ragweed Allergen Amb a 1.01 Exhibits Similar Allergenic Properties to Its Natural Counterpart from Common Ragweed Pollen
Source: MDPI journal article supplement (doi:10.3390/ijms25105175), 2024-05-09
Supplement: s1 [file s1]

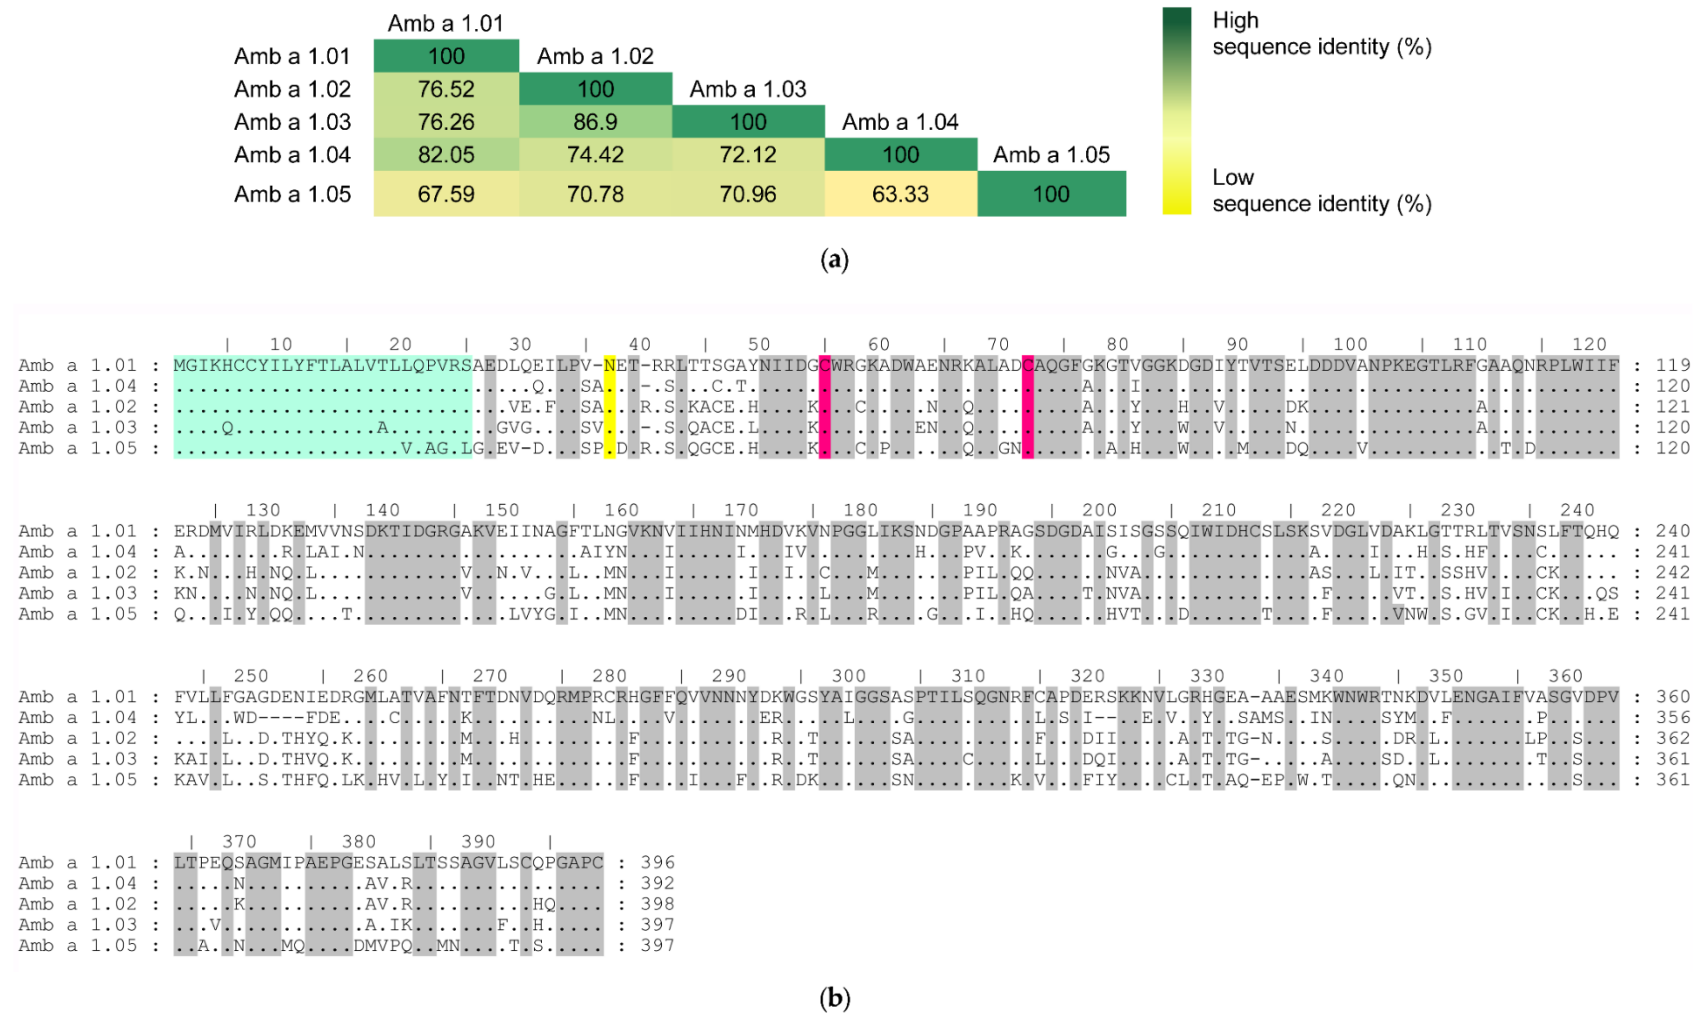

**Figure S1.** Sequence similarity of Amb a 1.01 with other Amb a 1 isoforms. **(a)** Sequence identity matrix of Amb a 1 isoforms. The identity percentage was determined by Clustal Omega. **(b)** Sequence alignment of Amb a 1.01 with other Amb a 1 isoforms. The

isoform sequences were ordered according to the percentage of homology with Amb a 1.01 isoform. The identical sequences were highlighted in grey, the N-glycosylation site was highlighted in yellow, the cysteine residues reported to form the disulphide bonds in Amb a 1.01 were highlighted in pink and the signal peptide was highlighted in blue. The sequence alignment was performed in GeneDoc.

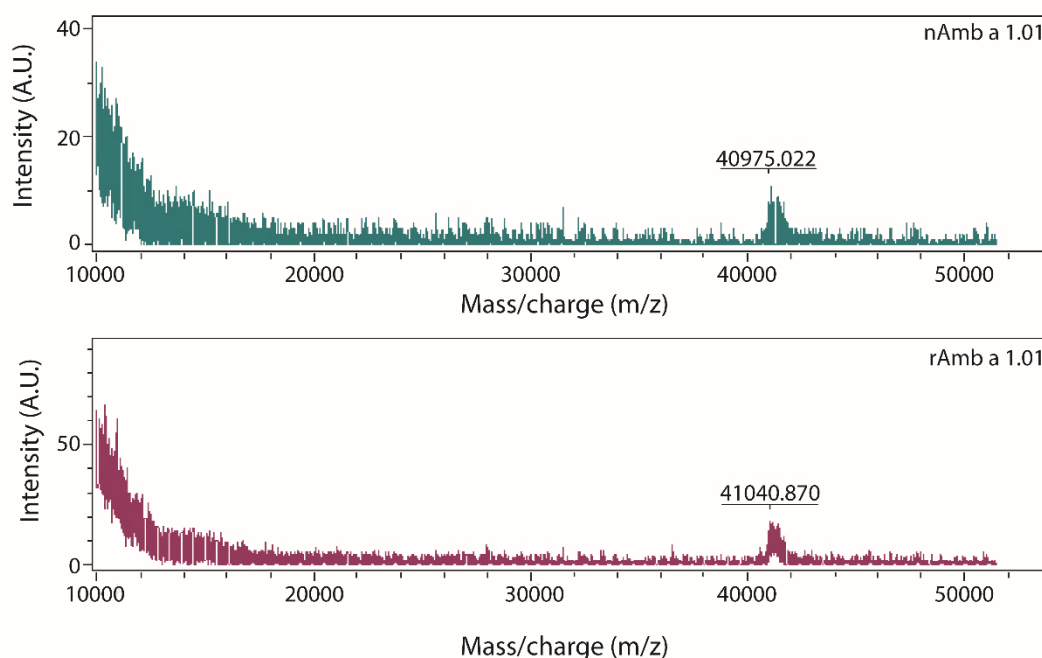

**Figure S2.** MALDI-TOF analysis of nAmb a 1.01 and rAmb a 1.01. The mass/charge ratio is indicated on the x-axis, and intensity is shown as absorption units (A.U.) of the most intensive signals obtained in the mass range (y-axis)

**Table S1.** IgE reactivity of rAmb a 1.01 and nAmb a 1.01 in ELISA and other sensitization of the patients included in the study.

| Patient number | rAmb a 1.01*<br>(cut off = 0.09) | nAmb a 1.01*<br>(cut off = 0.06) | Other sensitization than ragweed pollen                   |
|----------------|----------------------------------|----------------------------------|-----------------------------------------------------------|
| 156            | 1.177                            | 1.175                            | -                                                         |
| 157            | 0.752                            | 0.663                            | Hazel, Birch, Wheat, Grass pollen mix, Peanuts, Hazelnuts |
| 158            | 0.109                            | 0.127                            | Grass pollen mix, HDM, Cat, <i>Blatella</i>               |
| 159            | 0.292                            | 0.359                            | Grass pollen mix, HDM, Cat, Dog                           |
| 160            | 0.905                            | 0.666                            | -                                                         |
| 161            | 0.208                            | 0.293                            | -                                                         |
| 162            | 0.386                            | 0.404                            | Hazel, Birch, Beech, Wheat, Grass pollen mix, Mugwort     |
| 163            | 0.511                            | 0.562                            | Hazel, Birch                                              |
| 164            | 0.908                            | 0.928                            | Wheat, Grass pollen mix, Mugwort, HDM, Cat, Dog           |
| 165            | 0.347                            | 0.411                            | -                                                         |
| 166            | 0.445                            | 0.576                            | -                                                         |
| 167            | 0.292                            | 0.358                            | Birch, Lawn grass                                         |
| 168            | 0.641                            | 0.950                            | -                                                         |
| 169            | 0.643                            | 0.849                            | Wheat, HDM, <i>Aspergillus</i> , <i>Alternaria</i>        |
| 170            | 1.098                            | 1.205                            | -                                                         |
| 171            | 0.061                            | 0.047                            | -                                                         |

|     |       |       |                                                                                    |
|-----|-------|-------|------------------------------------------------------------------------------------|
| 172 | 0.510 | 0.491 | Wheat, Timothy grass, Barley,<br>Orchard grass                                     |
| 173 | 0.132 | 0.108 | -                                                                                  |
| 174 | 1.407 | 1.487 | Birch, Lawn grass, Timothy grass,<br>Barley, Orchard grass, HDM                    |
| 175 | 0.546 | 0.514 | -                                                                                  |
| 176 | 0.903 | 0.906 | Hazel, Wheat, Barley, Mugwort,<br>HDM                                              |
| 177 | 0.499 | 0.425 | HDM                                                                                |
| 178 | 0.169 | 0.159 | Birch, Lawn grass, Barley, Orchard<br>grass                                        |
| 179 | 0.430 | 0.485 | Birch, Wheat, Grass pollen mix,<br>Mugwort                                         |
| 180 | 0.583 | 0.813 | -                                                                                  |
| 181 | 0.250 | 0.380 | Hazel, Lawn grass                                                                  |
| 182 | 0.603 | 0.864 | Mugwort, HDM, <i>Alternaria</i> , <i>Candida</i>                                   |
| 183 | 0.872 | 1.021 | Timothy grass, Dog                                                                 |
| 184 | 0.426 | 0.477 | -                                                                                  |
| 185 | 0.345 | 0.454 | -                                                                                  |
| 186 | 0.211 | 0.294 | -                                                                                  |
| 187 | 0.241 | 0.276 | Wheat, Grass pollen mix, Cat                                                       |
| 188 | 0.551 | 0.462 | Beech                                                                              |
| 189 | 0.141 | 0.115 | Birch, Wheat, HDM                                                                  |
| 190 | 1.354 | 1.865 | Dactylis glomerata, Barley,<br>Mugwort, Blatella, <i>Candida</i>                   |
| 191 | 0.610 | 0.607 | HDM                                                                                |
| 192 | 0.245 | 0.250 | HDM                                                                                |
| 193 | 0.466 | 0.479 | Mugwort, HDM                                                                       |
| 194 | 0.800 | 0.927 | HDM                                                                                |
| 195 | 1.971 | 2.208 | -                                                                                  |
| 196 | 0.338 | 0.555 | Timothy grass, Lawn grass, Barley,<br>HDM                                          |
| 197 | 0.103 | 0.144 | HDM                                                                                |
| 198 | 1.327 | 1.217 | -                                                                                  |
| 199 | 2.581 | 2.527 | Hazel, Wheat, Timothy grass, Lawn<br>grass, Dactylis glomerata, Barley,<br>Mugwort |
| 200 | 0.180 | 0.175 | HDM                                                                                |
| 201 | 0.494 | 0.495 | Grass pollen mix, Barley,                                                          |
| 202 | 0.650 | 0.629 | Wheat, Lown grass, Mugwort                                                         |
| 203 | 0.836 | 1.032 | Mugwort                                                                            |
| 204 | 1.646 | 1.500 | Mugwort                                                                            |
| 205 | 0.818 | 0.615 | Grass pollen mix, Lawn grass,<br>Timothy grass, Dactylis glomerata,<br>Mugwort     |
| 206 | 0.414 | 0.198 | -                                                                                  |
| 207 | 1.167 | 1.293 | Mugwort, HDM                                                                       |
| 208 | 0.326 | 0.381 | Mugwort                                                                            |
| 209 | 0.344 | 0.336 | HDM                                                                                |

|     |       |       |                                                                                                            |
|-----|-------|-------|------------------------------------------------------------------------------------------------------------|
| 210 | 1.331 | 1.445 | Hazel, Birch, Wheat, Grass pollen mix, Rye, Mugwort, HDM                                                   |
| 211 | 0.494 | 0.711 | Grass pollen mix                                                                                           |
| 212 | 0.123 | 0.145 | Hazel, Birch, Wheat, Grass pollen mix, Lawn grass, Timothy grass, Barley, Cat                              |
| 213 | 2.811 | 2.643 | -                                                                                                          |
| 214 | 0.554 | 0.607 | -                                                                                                          |
| 215 | 0.486 | 0.469 | Grass pollen mix, HDM                                                                                      |
| 216 | 0.560 | 0.188 | -                                                                                                          |
| 217 | 0.930 | 1.237 | HDM                                                                                                        |
| 218 | 1.088 | 1.261 | -                                                                                                          |
| 219 | 2.419 | 2.598 | Wheat, Lawn grass, Timothy grass, Barley, Dactylis glomerata, Mugwort                                      |
| 220 | 2.394 | 2.305 | HDM                                                                                                        |
| 221 | 1.197 | 1.365 | -                                                                                                          |
| 222 | 1.250 | 1.995 | Hazel, Birch, Wheat, Grass pollen mix, Lawn grass, Timothy grass, Barley, Dactylis glomerata, Mugwort, HDM |
| 223 | 1.112 | 1.321 | -                                                                                                          |
| 224 | 0.611 | 1.056 | -                                                                                                          |
| 225 | 0.144 | 0.200 | Hazel, Birch                                                                                               |
| 226 | 0.569 | 0.495 | -                                                                                                          |
| 227 | 0.661 | 0.724 | Lawn grass                                                                                                 |
| 228 | 1.161 | 1.232 | Wheat, Grass pollen mix, Lawn grass, Timothy grass, Barley, Dactylis glomerata, Blatella                   |
| 229 | 1.230 | 1.285 | Wheat, Grass pollen mix, Lawn grass, Timothy grass, Barley, Dactylis glomerata,                            |
| 230 | 0.144 | 0.180 | -                                                                                                          |
| 231 | 0.738 | 1.049 | -                                                                                                          |
| 232 | 0.612 | 0.564 | -                                                                                                          |
| 233 | 1.041 | 1.102 | -                                                                                                          |
| 234 | 0.374 | 0.469 | Barley, Mugwort                                                                                            |
| 235 | 0.947 | 1.063 | Hazel, Birch, Barley, HDM                                                                                  |
| 236 | 2.592 | 2.706 | Grass pollen mix, Barley, HDM                                                                              |
| 237 | 1.235 | 1.573 | -                                                                                                          |
| 238 | 1.885 | 2.293 | Hazel, Birch, Grass pollen mix, HDM, Cat                                                                   |
| 239 | 1.281 | 1.294 | Timothy grass, Dactylis glomerata, Mugwort                                                                 |
| 240 | 1.413 | 1.092 | -                                                                                                          |
| 241 | 0.851 | 0.882 | -                                                                                                          |
| 242 | 0.907 | 0.936 | -                                                                                                          |
| 243 | 0.823 | 0.950 | Dog                                                                                                        |
| 244 | 0.222 | 0.234 | -                                                                                                          |
| 245 | 0.119 | 0.094 | -                                                                                                          |

|                       |     |              |              |                                                 |
|-----------------------|-----|--------------|--------------|-------------------------------------------------|
|                       | 246 | <b>0.996</b> | <b>1.335</b> | Hazel, Birch, Wheat, Grass pollen mix, Barley   |
|                       | 247 | <b>1.719</b> | <b>1.993</b> | Wheat, Lawn grass, Barley                       |
|                       | 248 | <b>0.347</b> | <b>0.489</b> | Grass pollen mix, Barley                        |
|                       | 249 | <b>1.436</b> | <b>1.411</b> | Wheat, Grass pollen mix, Barley, Mugwort, Cat   |
|                       | 250 | <b>1.578</b> | <b>1.610</b> | Hazel, Birch, Grass pollen mix, HDM, Alternaria |
|                       | 251 | <b>0.601</b> | <b>0.877</b> | -                                               |
|                       | 252 | <b>1.009</b> | <b>1.367</b> | -                                               |
|                       | 253 | <b>1.079</b> | <b>1.241</b> | HDM, Alternaria                                 |
|                       | 254 | <b>0.333</b> | <b>0.518</b> | HDM                                             |
|                       | 255 | <b>0.367</b> | <b>0.368</b> | Hazel, Birch, Grass pollen mix, Barley          |
| Total                 | 100 | 99           | 99           |                                                 |
| Sensitization profile |     |              |              |                                                 |
| Monosensitized        |     |              | 37%          |                                                 |
| Polysensitized        |     |              | 63%          |                                                 |
| Mugwort pollen        |     |              | 20%          |                                                 |
| Tree pollen           |     |              | 21%          |                                                 |
| Grass pollen          |     |              | 42%          |                                                 |
| HDM                   |     |              | 29%          |                                                 |
| Fungi                 |     |              | 5%           |                                                 |
| Cat                   |     |              | 7%           |                                                 |
| Dog                   |     |              | 4%           |                                                 |
| Blatella              |     |              | 3%           |                                                 |

ELISA positive values were marked with the bold and red color font \*mean OD values of the duplicates. HDM - house dust mite; Grass pollen mix: Orchard grass, Lawn grass, Red fescue, Rye, Timothy grass, Meadow soft grass

**Table S2.** Mediator release assay results after stimulation with nAmb a 1.01 and rAmb a 1.01

| Allergen concentration | Patient 199 |             | Patient 204 |             | Patient 207 |             | Patient 213 |             | Patient 226 |             | Patient 241 |             | Patient 248 |             | Patient 255 |             |
|------------------------|-------------|-------------|-------------|-------------|-------------|-------------|-------------|-------------|-------------|-------------|-------------|-------------|-------------|-------------|-------------|-------------|
|                        | nAmb a 1.01 | rAmb a 1.01 |
| 0                      | 6.03        | 6.03        | 2.94        | 2.94        | 4.67        | 4.67        | 2.74        | 2.74        | 5.1         | 5.1         | 3.87        | 3.87        | 3.71        | 3.71        | 4.84        | 4.84        |
| 0.01                   | 12.05       | 6.91        | 5.6         | 4.86        | 6.31        | 4.96        | 9.39        | 6.34        | 7.42        | 5.37        | 4.02        | 3.23        | 3.67        | 3.42        | 4.72        | 3.28        |
| 0.1                    | 27.19       | 8.55        | 15.24       | 6.61        | 9.62        | 5.43        | 40.33       | 18.65       | 5.83        | 4.93        | 5.87        | 3.36        | 5.61        | 3.79        | 4.38        | 4.68        |
| 1                      | 44.31       | 29.55       | 45.34       | 20.41       | 31.25       | 10.26       | 59.95       | 48          | 12.31       | 5.55        | 17.16       | 4.9         | 3.93        | 4.53        | 4           | 3.32        |
| 10                     | 59.57       | 57.99       | 63.63       | 64.28       | 52.3        | 41.17       | 60.47       | 69.39       | 36.42       | 20.17       | 43.87       | 25.9        | 13.56       | 8.06        | 14.02       | 6.71        |
| 100                    | 58.23       | 69.44       | 62.28       | 80.46       | 51.09       | 67.32       | 55.6        | 72.1        | 40.19       | 41.85       | 58.88       | 60.55       | 21.72       | 22.26       | 20.53       | 21.59       |
| 1000                   | 58.69       | 75.25       | 63.61       | 86.14       | 60.93       | 73.45       | 50.43       | 71.45       | 44.99       | 55.32       | 62.49       | 71.46       | 17.82       | 26.74       | 18.66       | 24.11       |

The green color marks an RBL degranulation above 20%.

**Table S3.** ImmunoCAP IgE inhibition results after sera incubation with buffer, rAmb a 1.01 and ragweed pollen extract

| <b>Patient</b>             | <b>Buffer</b><br>(IgE level -<br>kUA/L) | <b>rAmb a 1.01</b><br>(IgE level -<br>kUA/L) | <b>Ragweed pollen</b><br><b>extract</b><br>(IgE level - kUA/L) | <b>rAmb a 1.01</b><br>(Inhibition %) | <b>Ragweed pollen</b><br><b>extract</b><br>(Inhibition %) |
|----------------------------|-----------------------------------------|----------------------------------------------|----------------------------------------------------------------|--------------------------------------|-----------------------------------------------------------|
| 198                        | 11.093                                  | 0.657                                        | 0.934                                                          | 94.07                                | 91.58                                                     |
| 199                        | 52.807                                  | 7.43                                         | 8.047                                                          | 85.93                                | 84.76                                                     |
| 204                        | 17.708                                  | 2.052                                        | 2.292                                                          | 88.41                                | 87.05                                                     |
| 207                        | 20.14                                   | 1.191                                        | 1.757                                                          | 94.08                                | 91.27                                                     |
| 213                        | 102.769                                 | 24.742                                       | 25.447                                                         | 75.92                                | 75.23                                                     |
| 226                        | 9.239                                   | 1.016                                        | 1.509                                                          | 89.00                                | 83.66                                                     |
| 232                        | 5.241                                   | 0.881                                        | 0.885                                                          | 83.19                                | 83.11                                                     |
| 241                        | 9.969                                   | 0.865                                        | 0.726                                                          | 91.32                                | 92.71                                                     |
| 243                        | 10.541                                  | 0.817                                        | 1.326                                                          | 92.24                                | 87.42                                                     |
| 245                        | 0.383                                   | 0.006                                        | 0.035                                                          | 98.43                                | 90.86                                                     |
| 248                        | 4.335                                   | 0.256                                        | 0.656                                                          | 94.09                                | 84.86                                                     |
| 255                        | 4.466                                   | 0.397                                        | 0.458                                                          | 91.11                                | 89.74                                                     |
| NC                         | 0                                       | 0.004                                        | 0                                                              | -                                    | -                                                         |
| <b>Mean inhibition (%)</b> |                                         |                                              |                                                                | <b>89.82</b>                         | <b>86.86</b>                                              |

NC – negative control
